# Supplementary material
Source: publisher site journal article supplement (https://www.dovepress.com/article/238530)
Supplement: Supplementary file 1 [file get_supplementary_file.php]

**Table S1 Diagnosis method of postoperative complications**

| **Complications** | **Diagnosis Method** |
| --- | --- |
| Intra-abdominal infection | Confirmed by drainage culture |
| Respiratory infection | Confirmed by chest CT or sputum culture |
| Wound infection | Pus overflowed which need dressing change more than usual, confirmed by pus culture |
| Anastomosis leakage | Drainage of intestinal content or leakage in upper gastrointestinal series, confirmed by meilan test |
| Pancreatic fistula | Confirmed by drainage amylase |
| Catheter infection | Confirmed by catheter culture |
| Sepsis | Confirmed by blood culture |
| Urinary tract infection | Confirmed by urine culture |
| Cholecystitis | Confirmed by CT and ultrasound |
| Septic shock | Confirmed by blood culture and unstable of blood pressure, requiring ICU intervention |
| Deep vein thrombosis | Confirmed by ultrasound |
| Intra-luminal bleeding | Continuous decline of Hemoglobin, requiring transfusion or reoperation |
| Surgical gastroparesis syndrome | Continuous Gastric stasis without any evident of mechanical obstruction |
| Arrhythmia and Heart failure | Confirmed by ECG or BNP |
| Pleural effusion | Confirmed by CT, requiring ultrasound-guided puncture |
| Liver dysfunction and Renal failure | Confirmed by blood test |
| Small bowel obstruction | Confirmed by CT or erective abdominal X-ray |
| Pulmonary embolism | Confirmed by CTA |
| Anastomotic stricture | Confirmed by gastroscopy, requiring surgical intervention |
